# Supplementary material for: Direct regulation of fibroblast growth factor 23 by energy intake through mTOR
Source: PubMed Central journal article supplement (PMC7000745; doi:10.1038/s41598-020-58663-7), 2020-02-04
Supplement: 41598_2020_58663_MOESM1_ESM.pdf [file 41598_2020_58663_MOESM1_ESM.pdf]

# Direct regulation of fibroblast growth factor 23 by energy intake through mTOR

**Angela Vidal<sup>1,2</sup>, Rafael Rios<sup>1,2</sup>, Carmen Pineda<sup>1,2</sup>, Ignacio Lopez<sup>1,2</sup>, Juan R. Muñoz-Castañeda<sup>2</sup>, Mariano Rodriguez<sup>2</sup>, Escolastico Aguilera-Tejero<sup>1,2,\*,+</sup>, Ana I. Raya<sup>1,2,+</sup>**

*<sup>1</sup>Department of Animal Medicine and Surgery, University of Cordoba, Campus Universitario Rabanales, Cordoba, Spain*

*<sup>2</sup>Maimonides Biomedical Research Institute of Cordoba (IMIBIC), Reina Sofia University Hospital, University of Cordoba, Cordoba, Spain*

\*Corresponding author. Correspondence and requests for materials should be addressed to Escolastico Aguilera-Tejero (E A-T). Dept. Medicina y Cirugia Animal, University of Cordoba. Ctra. Madrid-Cadiz, Km 396, 14014, Cordoba, Spain  
E-mail: [eaquilera@uco.es](mailto:eaquilera@uco.es)

+These authors contributed equally to this work.

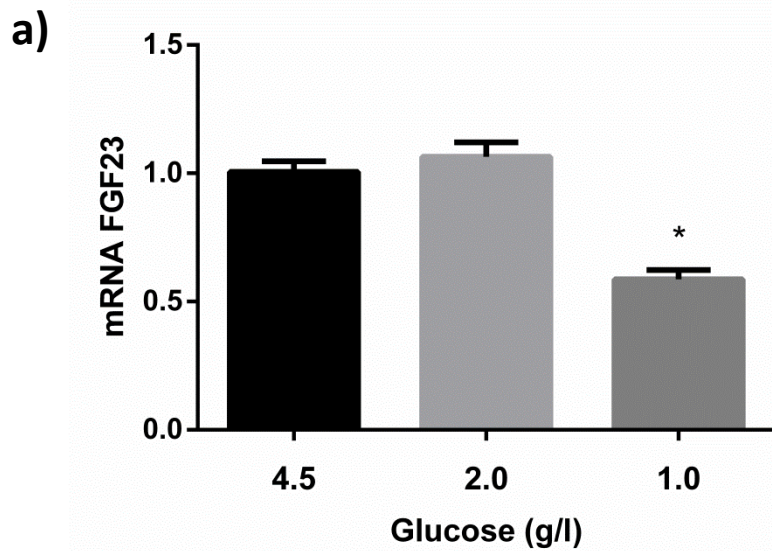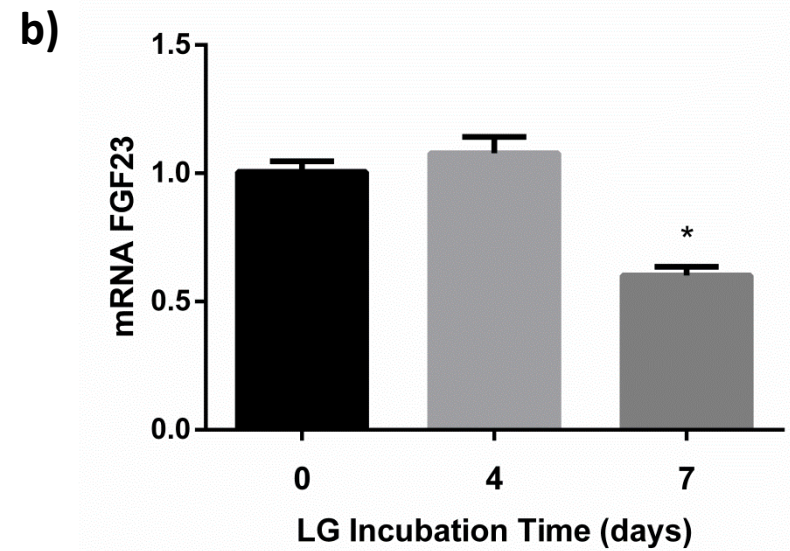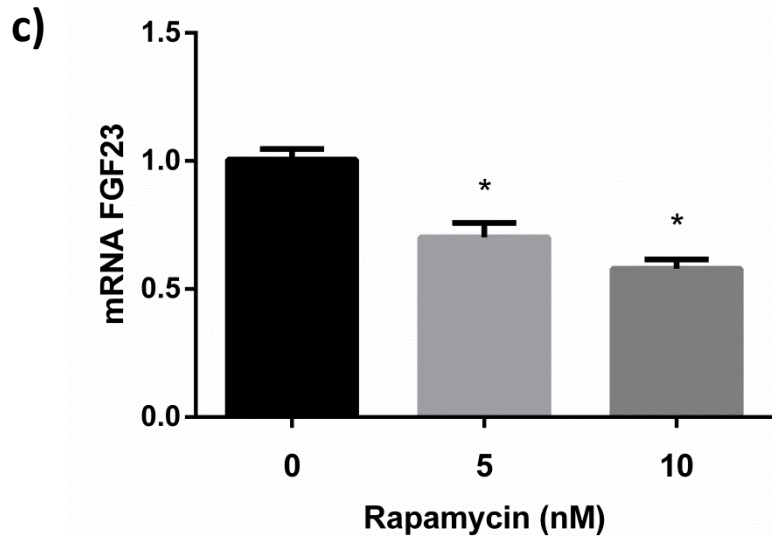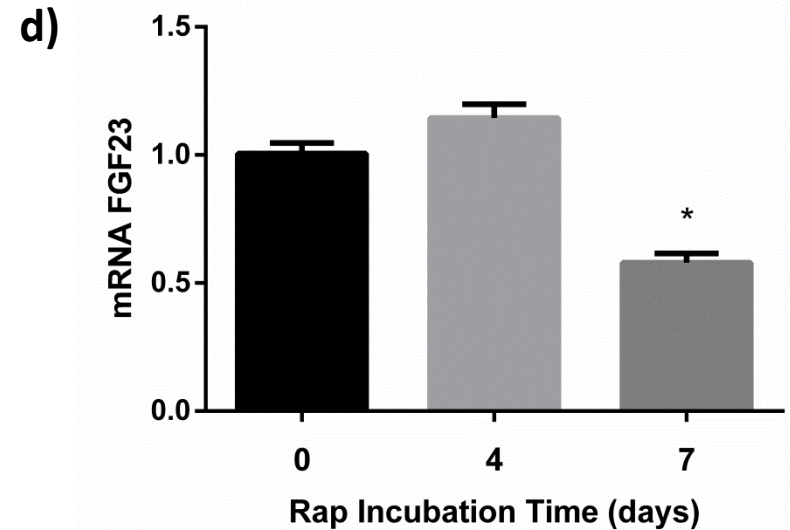

Supplementary Figure 1. a) Dose response of mRNA FGF23 production by UMR 106 cells to incubation for 6 days with different concentrations of glucose. b) Time dependence of mRNA FGF23 production by UMR 106 cells incubated with low glucose (LG, 1 g/l). c) Dose response of mRNA FGF23 production by UMR 106 cells to incubation for 6 days with different concentrations of rapamycin. d) Time dependence of mRNA FGF23 production by UMR 106 cells incubated with rapamycin (Rap, 10 nM).
